# Supplementary material for: Identification of the genetic mechanism that associates L3MBTL3 to multiple sclerosis
Source: PubMed Central journal article supplement (PMC9262392; doi:10.1093/hmg/ddac009), 2022-01-28
Supplement: hmg-2021-ce-00558_alcina_supplementary_material_ddac009.pdf [file hmg-2021-ce-00558_alcina_supplementary_material_ddac009.pdf]

**Supplementary Table 1.** Tagged SNPs of the *L3MBTL3* locus

| Tag-SNP    | SNP captured                                                                                                                                                                                                                                                                                                                                                                                                                          |
|------------|---------------------------------------------------------------------------------------------------------------------------------------------------------------------------------------------------------------------------------------------------------------------------------------------------------------------------------------------------------------------------------------------------------------------------------------|
| rs6569648  | rs7740107, rs6569648                                                                                                                                                                                                                                                                                                                                                                                                                  |
| rs9388768  | rs7746589, rs9372954, rs9388769, rs9375701, rs4551191, rs7761063, rs4351283, rs9492442, rs4279458, rs4373379, rs9375699, rs9385532, rs12197047, rs6569651, rs7774174, rs9375703, rs6914670, rs9375702, rs11759018, rs9385533, rs7760760, rs12201492, rs11752200, rs6900473, rs4339481, rs6923819, rs9375698, rs7763108, rs4594967, rs4321845, rs9375700, rs12661232, rs7451021, rs9402214, rs9388768, rs9402213, rs9388770, rs4404788 |
| rs4364506  | rs12190724, rs7762724, rs7769599, rs9483085, rs9492441, rs4548027, rs9492445, rs9483083, rs12198331, rs9483079, rs9492447, rs10499172, rs9492443, rs9483082, rs7759381, rs7764762, rs9492446, rs9492451, rs4364506, rs9492440, rs13209890, rs12206651                                                                                                                                                                                 |
| rs6569650  | rs9321207, rs4897364, rs7756733, rs6569650, rs4321846, rs9398939                                                                                                                                                                                                                                                                                                                                                                      |
| rs13211683 | rs7756339, rs9492452, rs7755589, rs9492454, rs9492449, rs13211683                                                                                                                                                                                                                                                                                                                                                                     |
| rs7740188  | rs12661188, rs9388766, rs7744830, rs1415700, rs6926186, rs9388767, rs6899976, rs9375694, rs7740188, rs9375695, rs7756870, rs9402211                                                                                                                                                                                                                                                                                                   |

SNPs were selected by pairwise tagging from EUR population of *The 1000 Genome project*. The selected region was chr 6\_129949823-130205324 from hg38. The 6 Tag-SNPs captured 86 markers with  $r^2 \geq 0.7$  (mean  $r^2 = 0.946$ ) and a minor allele frequency (MAF)  $\geq 0.1$

**Supplementary Table 2.** Oligonucleotide primers used in this study.

**ddPCR primers**

---

|           |                        |
|-----------|------------------------|
| a-Forward | GAGAGTGGACAGCAATTGTGAA |
| a-Reverse | GTAACGTGCCCACTCCATCT   |
| b-Forward | AGTTTGGAGCCCTGGAAGTT   |
| b-Reverse | TGAAAGGCATCCCAGTCTTC   |
| c-Forward | TCAGAAGGAAGAAAGGGACGTA |
| c-Reverse | CTTTTCCTCCGTGCTCTCTG   |
| d-Forward | TCACTGGTGCCAATTTCTTG   |
| d-Reverse | CACCACGCTTTCTTTCTTT    |
| e-Forward | ATGGAGCACAGACGAGGTGT   |
| e-Reverse | TCTTCTCTGCAGCTTTGAACA  |

---

**Cloning**

|                         |                          |
|-------------------------|--------------------------|
| 5'-Full-length isoform  | CACCTTGTGAAGATCGCCAGAGAG |
| 5'-Short-length isoform | CACCACTGGTGCCAATTTCTTGA  |
| 3'-Primer               | AAGTTCATTGTGAGAATTCTTC   |

---

**Tag-SNPs**

**TaqMan (Thermo Fisher Scientific)**

|            |                |
|------------|----------------|
| rs7740188  | C__1823591_20  |
| rs6569648  | C___303990_10  |
| rs9388768  | C__29894205_20 |
| rs6569650  | C__27442386_10 |
| rs13211683 | C__1783737_20  |

**Supplementary Table 3.** Demographical characteristics of patients and healthy controls included in the RNAseq and RT-digital qPCR

|                                                    | <b>MS<br/>(RNAseq/ddqPCR)</b> | <b>Healthy controls<br/>(RNAseq/ddqPCR)</b> |
|----------------------------------------------------|-------------------------------|---------------------------------------------|
| N                                                  | 29 (16/13)                    | 23 (1/22)                                   |
| <b>Gender</b>                                      |                               |                                             |
| Males                                              | 10                            | 9                                           |
| Females                                            | 19                            | 14                                          |
| <b>Age (years, med (P25-P75))</b>                  | 63 (51-68)                    |                                             |
| <b>Age at disease onset (years, med (P25-P75))</b> | 26(23/31)                     |                                             |
| <b>MS type</b>                                     |                               |                                             |
| RR                                                 | 21                            |                                             |
| SP                                                 | 8                             |                                             |
| <b>EDSS (med (P25-P75))</b>                        | 3 (1.5-7)                     |                                             |
| <b>Treatment at extraction</b>                     |                               |                                             |
| Non in the previous 3 months                       | 20                            |                                             |
| Glatiramer acetate                                 | 1                             |                                             |
| Interferon beta                                    | 3                             |                                             |
| Natalizumab                                        | 2                             |                                             |
| Fingolimod                                         | 3                             |                                             |

*med* median, *P25* 25th percentile, *P75* 75th percentile, *EDSS* Expanded Disability Status Scale.

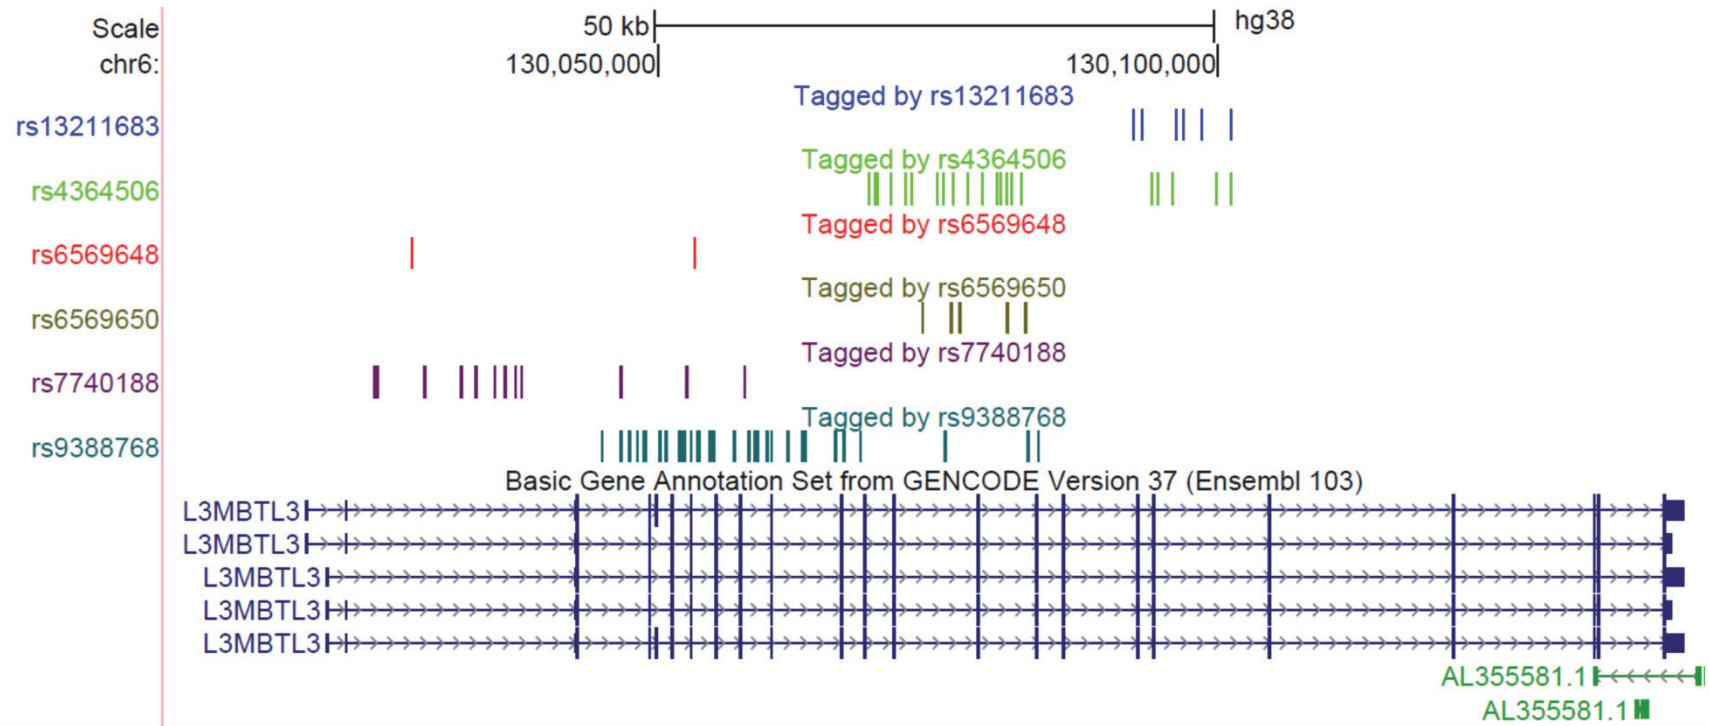

Supplementary Figure 1.  
 Location of the tagged SNPs at the *L3MBTL3* locus.

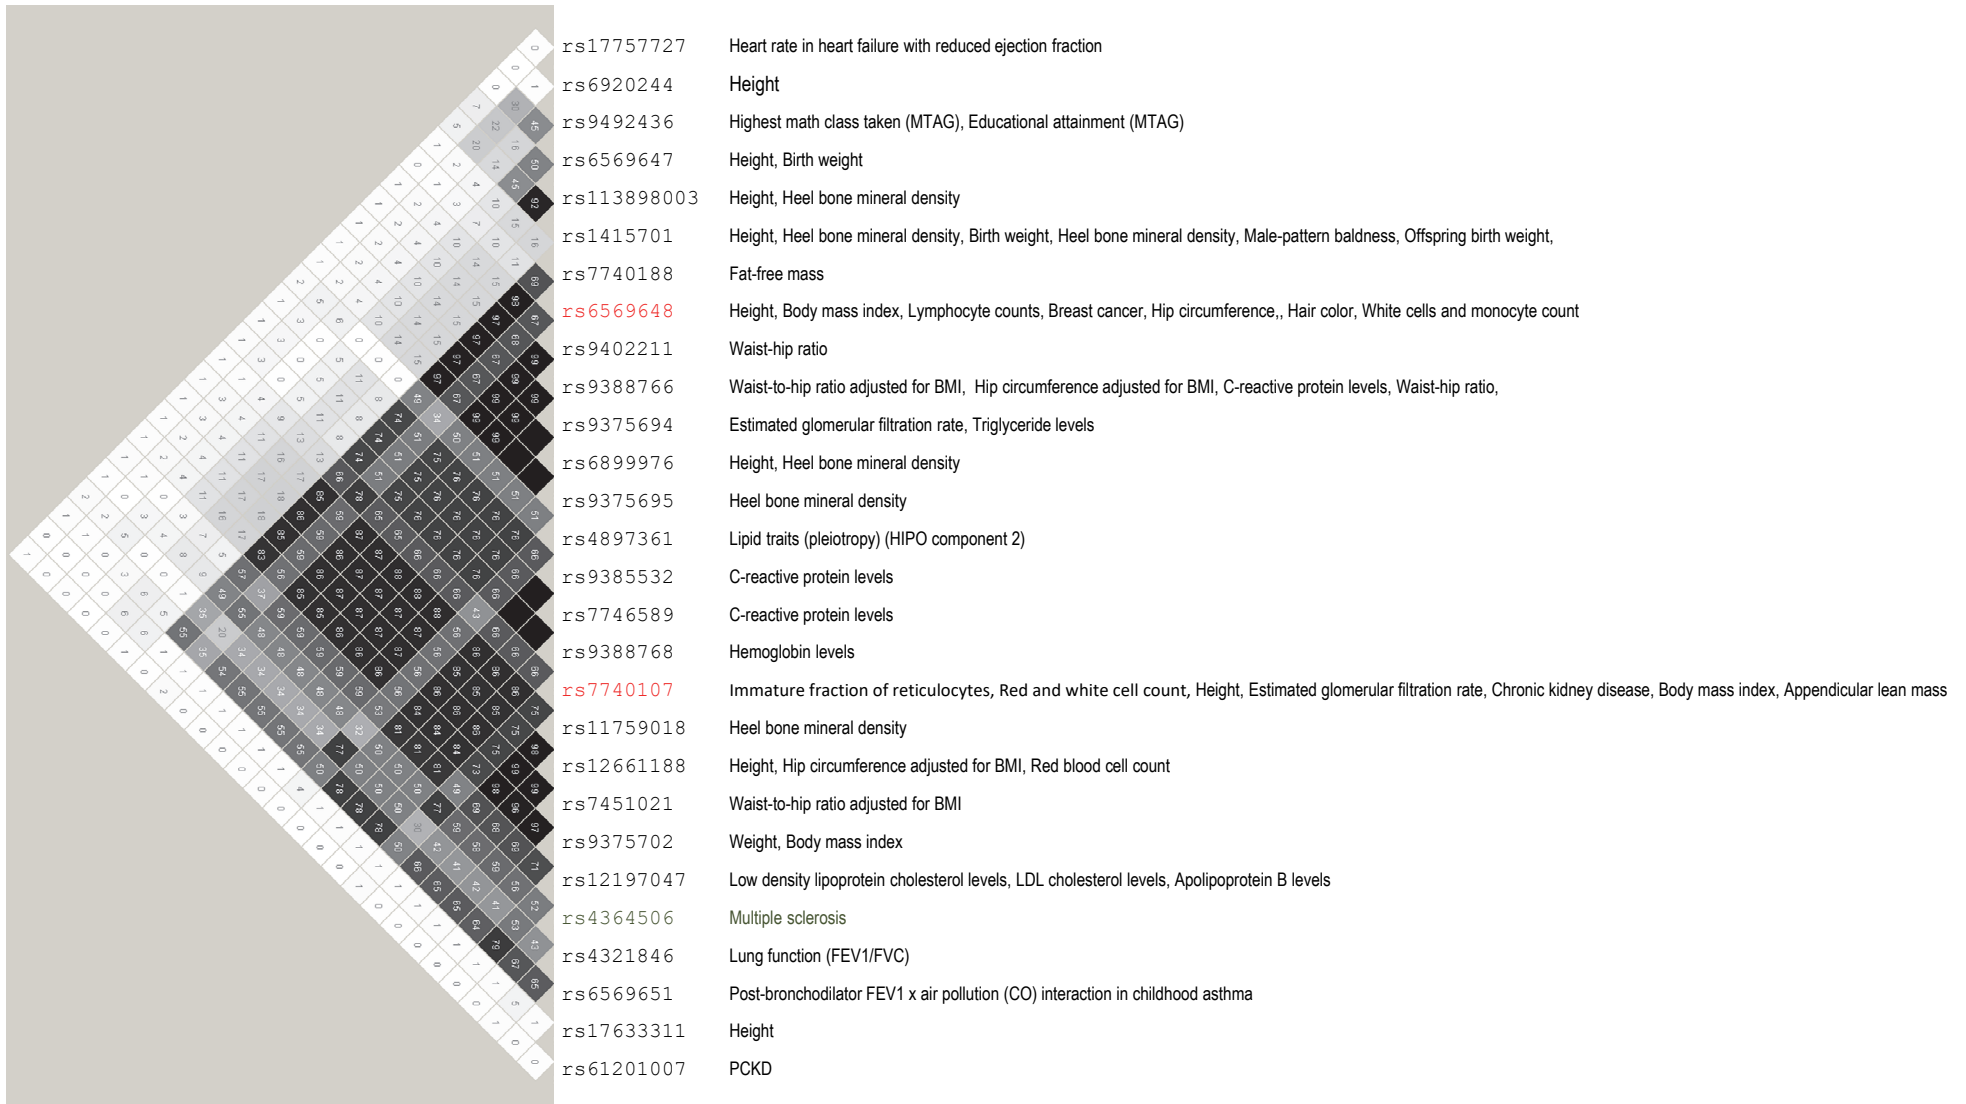

Supplementary Figure 2. Linkage disequilibrium (LD) plot of the SNPs of the *L3MBTL3* locus. Only the SNPs of the region that have been reported associated with a trait by GWAS are represented. Data obtained from GWAS catalogue (<https://www.ebi.ac.uk/gwas/>). LD in  $r^2$  and the data used was EUR population from The 1000 Genomes project. Haploview (<https://www.broadinstitute.org/haploview/haploview>) was used to perform calculations and depict the figure. In red are indicated the SNPs studied in the present article.
